1 **Highly efficient homology-directed repair using Cas9 protein in *Ceratitis***  
2 ***capitata***

3

4 Roswitha A. Aumann<sup>1</sup>, Marc F. Schetelig<sup>1,2\*</sup>, Irina Häcker<sup>1,2</sup>

5

6 <sup>1</sup> Justus-Liebig-University Gießen, Institute for Insect Biotechnology, Department of Insect  
7 Biotechnology in Plant Protection, Winchesterstr. 2, 35394 Gießen, Germany

8 <sup>2</sup> Fraunhofer Institute for Molecular Biology and Applied Ecology (IME), Division of Bioresources,  
9 Department of Insect Pest and Vector Control, 35394 Gießen, Germany

10

11 \* Corresponding author: [marc.schetelig@agrar.uni-giessen.de](mailto:marc.schetelig@agrar.uni-giessen.de)

12

13

14

15

16 **Abstract**

17 *Background*

18 The Mediterranean fruit fly *Ceratitidis capitata* is a highly polyphagous and invasive insect pest,  
19 causing vast economical damage in horticultural systems. A currently used control strategy is  
20 the sterile insect technique (SIT) that reduces pest populations through infertile matings with  
21 mass-released, sterilized insects. Transgenic approaches hold great promise to improve key  
22 aspects of a successful SIT program. However, there is strict or even prohibitive legislation  
23 regarding the release of genetically modified organisms (GMO), while novel CRISPR-Cas  
24 technologies might allow to develop genetically enhanced strains for SIT programs classified  
25 as non-transgenic.

26 *Results*

27 Here we describe highly efficient homology-directed repair genome editing in *C. capitata* by  
28 injecting pre-assembled CRISPR-Cas9 ribonucleoprotein complexes using different guide  
29 RNAs and a short single-stranded oligodeoxynucleotide donor to convert an enhanced green  
30 fluorescent protein in *C. capitata* into a blue fluorescent protein. Six out of seven fertile and  
31 individually backcrossed G<sub>0</sub> individuals generated 57-90% knock-in rate within their total  
32 offspring and 70-96% knock-in rate within their phenotypically mutant offspring.

33 *Conclusion*

34 Considering the possibility that CRISPR-induced alterations in organisms could be classified  
35 as a non-GMO in the US and Europe, our approach to homology-directed repair genome  
36 editing can be used to genetically improve strains for pest control systems like SIT without the  
37 need to struggle with GMO directives. Furthermore, it can be used to recreate and use  
38 mutations, found in classical mutagenesis screens, for pest control systems.

39

40

41

42 **Keywords**

43 Homology-directed repair, CRISPR-Cas9 ribonucleoprotein complexes, ssODN,  
44 Mediterranean fruit fly, medfly, Tephritids, genome editing, sterile insect technique

45

46

## 47 **Background**

48 With a large host range of more than 250 fruits, vegetables and nuts, a broad acceptance of  
49 both natural and cultivated habitats and tolerance over a comparatively wide temperature  
50 range the Mediterranean fruit fly, *Ceratitis capitata* (Wiedemann; Diptera: Tephritidae), has  
51 become one of the most successful invaders and thereby one of the most devastating and  
52 economically important insect pests worldwide [1-4].

53 In an attempt to reduce the use of insecticides in the fight against this and other crop pests,  
54 an effective, environmentally friendly, species-specific and area-wide control method has been  
55 the sterile insect technique (SIT) [5]. SIT is based on the mass release of sterilized male  
56 insects into a wild-type (WT) population, leading to infertile matings and thereby to a decrease  
57 in the number of progeny. Repeated releases thus allow for the suppression of a pest  
58 population to an economically uncritical size or to prevent the infestation of new areas.

59 There are several steps to be developed and improved to enable successful SIT programs.  
60 One is the generation of male-only populations also called *sexing*. Male-only releases are  
61 more effective and avoid the release of females that could still damage the fruits and crops by  
62 oviposition even if the eggs will not develop due to the sterilization step [6]. The sexing system  
63 has to be an automated mechanism during the mass rearing process to enable the mass  
64 production of billions of male flies like in the case of the Mediterranean fruit fly [7].  
65 Unfortunately, only few systems are available based on naturally occurring and utilized genetic  
66 mutations. Their transfer to new pest insects is difficult since the mode-of-action is not solved  
67 or the genes responsible for the effect are not identified [8, 9]. Therefore, sexing systems that  
68 are based on transgenes were developed in several species [10-13]. However, to date the  
69 release of transgenic organisms is highly regulated or even prohibited. Therefore, a tool that  
70 is able to create efficient and safe sexing systems, similar to classical mutagenesis and  
71 acceptable for a release, is needed.

72 In Europe, the deliberate release of genetically modified organisms (GMOs) is regulated by  
73 the 'GMO Directive' of the European Parliament and the Council on the deliberate release of  
74 genetically modified organisms into the environment (Directive 2001/18/EC, Council directive  
75 90/220/EEC). Organisms covered by that directive have to undergo an environmental risk  
76 assessment to obtain authorization, and are subject to traceability, labelling, and monitoring  
77 regulations [14]. However, genetically modified organisms created via mutagenesis  
78 techniques are not included in the GMO Directive ('the mutagenesis exemption' of the GMO  
79 Directive of 2001, according to the EU court of justice). By its definition, mutagenesis involves  
80 the alteration of the genome of a living species but does not, unlike transgenesis, entail the  
81 insertion of foreign DNA into the organism [15].

82 Traditional mutagenesis techniques include chemical or UV mutagenesis, which both create  
83 random mutation products [16]. Recent development in targeted mutagenesis through  
84 CRISPR-Cas enables the editing of genes in two ways [17-19]. Either by the non-homologous  
85 end-joining (NHEJ) or the homologous-directed repair (HDR) pathway. While the NHEJ  
86 pathway is, in simplified terms, a rather 'error-prone' pathway, causing random insertions or  
87 deletions of nucleotides at the target site, the HDR pathway can be exploited to precisely  
88 manipulate the target sequence by providing a suitable DNA repair template including the  
89 desired alteration [20]. This allows the introduction of specific sequence changes without  
90 leaving exogenous DNA sequences in the genome. Therefore, once established in a new pest  
91 species, CRISPR-Cas HDR could be the long-awaited tool to overcome the disadvantages of

92 conventional mutagenesis and transgenic methods to establish strains for SIT programs. This  
93 could improve the generation of insect strains without unintended and unknown changes in  
94 the genome caused by traditional mutagenesis.

95 To achieve specific genome alterations via CRISPR-Cas HDR in a highly effective manner, it  
96 is necessary to shift the equilibrium of NHEJ and HDR towards the less efficient HDR pathway  
97 [21]. At the same time, the balance between the two repair pathways differs widely among  
98 species and between different cell types of a single species as well as different cell cycle  
99 phases of a single cell [21]. Improving the efficiency of HDR was explored by the inhibition of  
100 key enzymes of the NHEJ pathway like the DNA ligase IV using the inhibitor Scr7 [22, 23] or  
101 the controlled timing of Cas9 delivery according to cell-cycle dynamics [24, 25]. Other  
102 important aspects for a precise HDR event are the prevention of re-editing of already modified  
103 loci, for example by introducing mutations in the protospacer adjacent motif (PAM) sequence  
104 or the guide RNA (gRNA) target site of the repair template, as well as considering the effects  
105 of the distance between the DSB site and desired mutation position on the mutagenesis  
106 efficiency [26, 27].

107 To determine the efficiency of such HDR-improving methods, a strategy for the simultaneous  
108 quantification of HDR and NHEJ events is targeting an enhanced green fluorescent marker  
109 protein (eGFP) and converting it into the blue fluorescent protein (BFP) [28]. This can be done  
110 by two single base substitutions in the chromophore of eGFP [28, 29]. Thereby, green  
111 fluorescence shows the absence of a mutation event, blue fluorescence indicates an HDR  
112 event and the loss of fluorescence represents unspecific mutation events caused by NHEJ  
113 repair. So far, in *Medfly*, mutant phenotypes could only be generated by NHEJ repair after  
114 CRISPR-Cas9-based gene disruption [30].

115 Here, we report the first and highly efficient CRISPR-Cas HDR knock-in of a short single-  
116 stranded oligodeoxynucleotide (ssODN) repair template in *C. capitata*, by injecting *in vitro*  
117 preassembled Cas9-gRNA ribonucleoprotein complexes and a single-stranded oligo donor  
118 into *C. capitata* embryos carrying an eGFP marker gene to convert eGFP to BFP.

119

## 120 **Results**

### 121 **Selection of gRNAs for eGFP mutagenesis in *C. capitata* and off-target analysis**

122 Two previously evaluated guide RNAs against eGFP [28] were used to lead the Cas9 protein  
123 towards the chromophore of the eGFP marker gene of the transgenic *C. capitata* strain  
124 *TREhs43-hid<sup>Ala5</sup>\_F1m2* [31]. The gRNAs target the same region, therefore one HDR repair  
125 template (single-stranded oligodeoxynucleotide blue fluorescent protein, ssODN\_BFP [28])  
126 was used for both. They differ, however, in their orientation and cleavage site, as well as in  
127 the number of mismatches to their target sequence resulting from successful HDR (Fig. 1A)  
128 and their off-target activity.

129 *In silico* target site analysis predicted an on-target activity score of 0.272 for the eGFP\_gRNA2  
130 (scores are between 0 and 1; the higher the score the higher the expected activity [32]) and  
131 zero off-targets sites in the medfly genome (100% off-target score). eGFP\_gRNA2b has an  
132 on-target activity score of 0.329 but two off-targets (98.94% off-target score: #1 score 4.23%;  
133 location NW\_004524467.1 4,259 338 < 4,259,360; #2 score 1.13%; location  
134 NW\_004523691.1 10,017,309 < 10,017,331; Ccap 1.1). Both off-target sites of

135 eGFP\_gRNA2b show four mismatches to the reference genome sequence. Importantly, none  
136 of the off-target sites are located in a coding sequence of *C. capitata* genome.

137 The repair template, ssODN\_BFP, differs from the eGFP sequence by three bases (194C>G,  
138 196T>C, 201C>G; Fig. 1A), whereby the first change (194C>G; Thr65>Ser65) causes a  
139 reversion of eGFP back to wild-type GFP and the second (196T>C; Tyr66>His66) converts  
140 GFP to BFP [28]. The third SNP (201C>G) is a silent mutation to further reduce the gRNA-  
141 target sequence similarity after HDR and thus prevent re-editing of the target sequence [28]  
142 (Fig. 1 A).

143

#### 144 **CRISPR-Cas9 HDR mutagenesis in Medfly**

145 Three injections were conducted to perform eGFP mutagenesis in the Medfly target line,  
146 homozygous for the eGFP marker gene. Two injections were performed with the gRNA  
147 eGFP\_gRNA2 and one with gRNA eGFP\_gRNA2b (Fig. 1 A). One of the eGFP\_gRNA2  
148 injections additionally contained the ligase IV inhibitor Scr7 in the injection mix. Each G<sub>0</sub> adult  
149 survivor was screened for eGFP fluorescence to confirm the presence of the CRISPR target  
150 site, and individually backcrossed. Their offspring (G<sub>1</sub>) were screened for eGFP and BFP  
151 fluorescence.

152 First, the **eGFP\_gRNA2** was injected with recombinant Cas9 protein and the ssODN\_BFP  
153 donor template into 243 embryos of the strain *TREhs43hid<sup>Ala5</sup>\_F1m2*, homozygous for eGFP.  
154 16 reached the larval stage of which eight survived to adulthood. These (three males and five  
155 females) were individually backcrossed to *EgII* wild type virgin females and males,  
156 respectively. Eggs of these crosses were collected three times, at an interval of one to two  
157 days. Three crosses (M1, F2, F8) were fertile and two out of these three families produced  
158 phenotypically WT offspring missing the eGFP marker (Fig. 2). This effect was observed in 98  
159 out of 116 flies (84%) in family M1 (Fig. 3 A), and 34 out of 42 flies (81%) in family F8 (Fig. 3  
160 D). The loss of the eGFP fluorescence was interpreted as a positive CRISPR event  
161 (insertion/deletion or knock-in event at the target site). Blue fluorescence was not observed in  
162 any of the G<sub>1</sub> flies.

163 In a second, independent experiment, 323 embryos of the target line were injected with  
164 **eGFP\_gRNA2 and 1 mM Scr7** additionally added to the injection mix. 79 reached the larval  
165 stage with 31 surviving to adulthood (17 males, 14 females). These were then backcrossed  
166 individually and eggs collected from 27 fertile crosses as described previously. In total, 1967  
167 G<sub>1</sub> offspring were screened for the loss of eGFP fluorescence. However, none of the families  
168 produced offspring phenotypically missing the eGFP marker.

169 Thirdly, **eGFP\_gRNA2b-Cas9** complexes together with ssODN\_BFP donor template were  
170 injected into 371 embryos, yielding 19 larvae and 9 adult flies (five males, four females). Four  
171 of the nine individual crosses (M3, M5, F1, F4) were fertile and produced offspring mainly  
172 phenotypically missing the eGFP marker (79% to 100%), indicating a CRISPR-induced  
173 mutation (Fig. 3 G, J, M, P).

174

175

176

## 177 **Molecular verification of HDR or other mutagenic events**

178 The genotype of all phenotypically WT  $G_1$  flies was analyzed via eGFP-specific PCR and  
179 subsequent sequencing, except for four individuals in family M1 and two in family F8, as DNA  
180 and sequence information could not be obtained for these flies.

181 Sequencing of DNA amplicons from individuals of **eGFP\_gRNA2** injection revealed that 18  
182 out of 94 phenotypically WT M1 offspring (19%) carried the complete knock-in genotype (three  
183 base pairs exchanged) and 50 (53%) carried a shorter version of the knock-in with only two of  
184 the three base pairs altered (194C>G, 196T>C). Both should lead to a loss of eGFP  
185 expression. The knock-out phenotype of the remaining 26 flies (28%) was caused by  
186 insertions or deletions in the target region (four different mutation events; Fig. 1 B, Fig. 3 B).  
187 In case of family F8, sequencing showed that 17 out of 32 phenotypically WT flies carried the  
188 complete knock-in genotype (three bp HDR) (53%) and nine carried the shorter version of the  
189 knock-in with two out of three bp mutated (28%). Moreover, two different deletion events  
190 caused by NHEJ repair were observed in six flies (19%: Fig. 1 B, Fig. 3 E).

191 Interestingly, the two different HDR events in  $G_1$  (complete three bp HDR versus two bp HDR)  
192 were not evenly distributed over the three egg collection time points (T1, T2, T3). In both  
193 families, the percentage of the complete HDR increased over time, whereas the rate of the  
194 partial HDR decreased. In the M1 family, 73% of the offspring from the first egg collection (T1)  
195 carried the partial knock-in, whereas only 22% of the offspring from the last egg collection (T3)  
196 carried this genotype. The complete knock-in was observed in 11.5% of the T1-offspring and  
197 in 37% of the T3-offspring of M1. In the F8 family, the partial knock-in decreased from 71.4%  
198 in T1 to none in T3. In contrast, the complete knock-in increased from 28.5% (T1) to 100%  
199 (T3) (Fig. 3 C, F).

200 In the second injection using **eGFP\_gRNA2 plus Scr7**, no phenotypically wild type individuals  
201 were found during the screening and consequently no PCR amplicons could be generated or  
202 analyzed.

203 Analyzing the amplicons of the third injection with **eGFP\_gRNA2b** confirmed efficient HDR in  
204 all four families, with 70% to 96% complete knock-in genotype within the phenotypically WT  
205 offspring. NHEJ caused one to two different mutation events per family, explaining the knock-  
206 out phenotype of the remaining flies (Fig. 3 H, K, N, Q; Fig. 1B). The occurrence of HDR events  
207 increased from the first to the third egg collection time point in families M5 and M3 (Fig. 3 I,  
208 L). Family F1 produced only ten  $G_1$  progeny collected from two egg collections, but nine  
209 showed complete knock-in genotypes (Fig. 3 O). In family F4, knock-in events slightly  
210 decreased over time (Fig. 3 R). None of the analyzed individuals originating from the  
211 eGFP\_gRNA2b injections carried the incomplete knock-in with only two bp changed instead  
212 of three that was observed with eGFP\_gRNA2.

213

## 214 **Discussion**

215 Genome editing in Medfly was successfully developed and evaluated via CRISPR-Cas HDR,  
216 using a short ssODN repair template to introduce point mutations in the eGFP marker gene of  
217 the transgenic line *TREhs43hid<sup>Ala5</sup>\_F1m2*. We used two different gRNAs to target eGFP and  
218 one single-stranded repair template (ssODN\_BFP) to achieve the conversion. After successful  
219 HDR, two mismatches were introduced to the target sequence of eGFP\_gRNA2 (194C>G;

220 196T>C), while its PAM sequence remained intact. Regarding eGFP\_gRNA2b, an HDR event  
221 introduced one mismatch to the target sequence (201C>G) and two to the PAM sequence  
222 (194C>G; 196T>C), whereby the PAM was eliminated (Fig. 1 A).

223 While only 50% of the injection survivors were fertile, we observed a very high efficiency of  
224 CRISPR-induced mutations, not only in the frequency of CRISPR-positive families (six out of  
225 seven fertile G<sub>0</sub>), but also in the penetrance within the families. Between 79 and 100% of G<sub>1</sub>  
226 individuals within a family showed the phenotypical loss of eGFP fluorescence, indicating a  
227 mutation event and efficient targeting of the germ line in the G<sub>0</sub> individuals. Sequence analysis  
228 confirmed these events and moreover revealed a knock-in rate of up to 96% (Fig. 3). We did  
229 not observe, however, the blue fluorescence that would be the phenotypic confirmation of a  
230 positive knock-in event. Reasons for this could be to the melanization of the medfly thorax or  
231 an autofluorescence overlapping with the spectrum of the ET DAPI BP filter.

232 Besides the three base pair BFP knock-in, we also detected a ‘partial knock-in’ with only two  
233 out of three base pairs changed when we used eGFP\_gRNA2, but not with eGFP\_gRNA2b.  
234 It was reported earlier that during HDR often only the part of the repair template actually  
235 overlapping with the deletion caused by the DSB is utilized [27, 33]. As small deletions are  
236 more common than large deletions, the probability for a mutation to be incorporated during  
237 the HDR event decreases with the increasing distance from the cleavage site. This finding  
238 could explain the missing third SNP in the first experiment (201C>G, ‘partial knock-in’), as that  
239 SNP is the one most distal to the DSB side of eGFP\_gRNA2. However, we did not observe  
240 anything similar for eGFP\_gRNA2b, although the distance between the cleavage site and the  
241 most distal SNP is similar (six bp for eGFP\_gRNA2b, versus seven bp for eGFP\_gRNA2).  
242 Alternatively, the occurrence of the partial knock-in could be the result of re-editing of the  
243 already modified locus [26], as the PAM of eGFP\_gRNA2 remains intact after HDR whereas  
244 the PAM of eGFP\_gRNA2b becomes eliminated. To ensure precise modification of the target  
245 site it is therefore important to include PAM-site mutations (silent) into the repair template [27].

246 This correlates also to the fact that the ‘complete knock-in’ increased over time in four out of  
247 six families. In contrast, the rate of the ‘partial knock-in’, which occurred in the two  
248 ‘eGFP\_gRNA2’ families, decreased over time. This could indicate a general trend of  
249 increasing probability of knock-in events in egg collections from older adults. Such  
250 phenomenon paired with high efficiency would offer a possibility to save time and resources  
251 in mutagenic screens, especially while targeting genes which do not alter the phenotype.  
252 Further experiments will be needed, however, to corroborate these findings.

253 The additional use of Scr7 in the injection mix did not yield any phenotypic CRISPR events in  
254 Medfly. Scr7 inhibits DNA ligase IV, a key enzyme in the NHEJ pathway and has been shown  
255 to enhance the HDR rate in human cell cultures or mouse embryos [22]. Interestingly, the use  
256 of Scr7 increased the hatching rate compared to two injections without Scr7 (24.5% versus  
257 6.6% and 5.1%, respectively). While injections of zinc finger nuclease together with circular  
258 donor DNA in ligase IV-deficient *Drosophila melanogaster* embryos successfully increased  
259 HDR compared to injections into WT flies [34, 35], Scr7, to our knowledge, has not been tested  
260 to enhance HDR in insects successfully. Therefore, further experiments with Scr7 at different  
261 concentrations will be interesting to investigate if it could have any effect in insects.

262 The use of an end-concentration of 300 mM KCl in the injection mix, as suggested previously  
263 for other Cas9 proteins [30, 36], seemed to help solubilizing the utilized Cas9-gRNA RNPs,

264 as there were no issues regarding clogging of needles while injecting these concentrations of  
265 protein and RNA (360 ng/μl Cas9 protein and 200 ng/μl gRNA).

266 CRISPR-Cas allows a wide variety of genome editing strategies from small InDels at defined  
267 positions in the genome via NHEJ to the targeted introduction of point mutations (SNPs) via  
268 HDR all the way to the knock-out or knock-in of complete genes. While gene knock-in most  
269 probably will be classified as GMO, ‘non-traceable’ CRISPR-induced mutations like InDels  
270 and SNPs, potentially might be regarded as non-GMO in the EU according to the ‘mutagenesis  
271 exemption’ foreseen in the GMO Directive [14, 15]. CRISPR-Cas can be another technique of  
272 mutagenesis and if part of the mutagenesis exemption of EU legislation in the future, it could  
273 be handled in a similar way to other mutagenesis techniques (e.g. UV or chemical  
274 mutagenesis) [15, 37]. In the US, the United States Department of Agriculture, Animal and  
275 Plant Health Inspection Service (USDA APHIS) recently classified CRISPR-edited organisms  
276 as ‘not regulated’ under 7 *CFR part 340*. One example is the modified white button mushroom  
277 (*Agaricus bisporus*) with an anti-browning phenotype which is achieved by the introduction of  
278 small deletions (1-14 bp) in a specific polyphenol oxidase gene via CRISPR gene editing [38].

279 The classification of certain CRISPR-induced alterations as non-GMO would allow the  
280 application of this highly efficient and versatile technique for the development of new or  
281 improved strains for Medfly SIT programs and possibly for other related Tephritid fruit flies.  
282 The release of these strains would not be restricted via the GMO-Directive, and could be  
283 discussed in line with other solutions in terms of public acceptance, which is vital to the  
284 establishment and success of novel and safe pest control systems.

285

286

## 287 **Conclusions**

288 Precise genome engineering is a powerful tool to improve and develop genetic pest control  
289 strategies to fight devastating and economically important pest species like the Mediterranean  
290 fruit fly. We demonstrate that genome editing via CRISPR-Cas HDR using a short, single-  
291 stranded DNA repair template is highly efficient in the Tephritid fruit pest *C. capitata*. If this  
292 high efficiency can be matched with larger repair templates remains to be seen. As there is  
293 the possibility that such ‘not-traceable’ CRISPR-induced mutations could be classified as non-  
294 GMO in the US as well as in Europe, the establishment of CRISPR-Cas genome editing in  
295 Medfly will be crucial for the development of new, genetically optimized strains for pest  
296 management systems like the classical SIT that are not restricted and GMO-free. This is the  
297 first report of successful CRISPR-Cas HDR genome editing in the family of Tephritidae, which  
298 contain a number economically important fruit pest species. The establishment of CRISPR-  
299 Cas genome editing in Medfly therefore is an important step towards the application of this  
300 technique to other Tephritid fruit pests like *Bactrocera dorsalis*, *B. oleae*, *Anastrepha ludens*,  
301 and *A. suspensa* and will be crucial for the development of non-transgenic and non-GM  
302 strategies to fight these pest insects.

303



## 304 **Material and methods**

### 305 **Fly rearing**

306 The *Ceratitis capitata* transgenic target line *TREhs43<sup>Ala5</sup>\_F1m2* flies [31] and wild type *Egypt-*  
307 *II* (*EgII*, obtained from the FAO/IAEA Agriculture and Biotechnology Laboratory, Seibersdorf,  
308 Austria) flies were maintained in a controlled environment (26°C, 48% RH, and a 14:10  
309 light/dark cycle) and fed with a mixture of sugar and yeast extract (3v:1v), and water. Larvae  
310 were reared on a gel diet, containing carrot powder (120 g/l), agar (3 g/l), yeast extract (42  
311 g/l), benzoic acid (4 g/l), HCl (25%, 5.75 ml/l) and Ethyl-4-hydroxybenzoat (2.86 g/l). Larvae  
312 and flies from injected embryos were reared under the same conditions. *TREhs43<sup>Ala5</sup>\_F1m2*  
313 flies used for CRISPR gene editing carry an eGFP marker under the control of the *D.*  
314 *melanogaster polyubiquitin* promotor [31]. The eGFP marker gene is expressed in head,  
315 thorax and legs of the adult fly. Flies were anesthetized with CO<sub>2</sub> for screening, sexing, and  
316 the setup of backcrosses.

### 317 **CRISPR-Cas9 reagents**

318 Purified Cas9 protein was obtained from PNA Bio Inc (catalog number CP01). The lyophilized  
319 pellet was reconstituted to a stock concentration of 1 µg/µl in 20 mM Hepes, 150 mM KCl, 2%  
320 sucrose and 1 mM DTT (pH 7.5) by adding 25 µl nuclease free H<sub>2</sub>O and stored at -80°C until  
321 use.

322 Linear double-stranded DNA templates for specific gRNAs were produced by a template-free  
323 PCR reaction with two partially overlapping oligos, containing 20 µl 5xQ5 reaction buffer, 10  
324 µl dNTP Mix (2 mM each), 5 µl of each primer (10 µM) and 1 µl Q5 HF polymerase (2U) (New  
325 England Biolabs, NEB) in a total volume of 100 µl. PCR reactions were run in a Bio-Rad  
326 C1000 Touch thermal cycler [98°C, 30 s; 35 cycles of (98°C, 10 s; 58°C, 20 s; 72°C, 20 s);  
327 72°C, 2 min] [39]. For the synthesis of the guide RNA eGFP\_gRNA2 primers P\_986  
328 (GAAATTAATACGACTCACTATAGGCTCGTGACCACCCTGACCTAGTTTTAGAGCTAGAA  
329 ATAGC) and P\_369  
330 (GCACCGACTCGGTGCCACTTTTTCAAGTTGATAACGGACTAGCCTTATTTAACTTGCT  
331 ATTTCTAGCTCTAAAAC) were used, for the synthesis of eGFP\_gRNA2b primers P\_1172  
332 (GAAATTAATACGACTCACTATAGGCTGAAGCACTGCACGCCGTGTTTTAGAGCTAGAAA  
333 TAGC) and P\_369 were used. The forward primers (P\_986, P\_1172) encode the T7  
334 polymerase-binding site followed by the specific gRNA target sequence and ending with the  
335 20 nt complementary sequence that allows forward and reverse primers to anneal. Reverse  
336 primer (P\_369) is a common oligonucleotide that can be used for all targets encoding the Cas9  
337 interacting portion of the gRNA sequence [39]. The specific gRNA target sequence of gRNAs  
338 eGFP\_gRNA2 and eGFP\_gRNA 2b was previously described [28]. Size verification was  
339 carried out using 2 µl of the reaction while the remaining 98 µl were purified using a PCR  
340 purification kit (DNA Clean & Concentrator™-25; Zymo Research, Irvine, CA, USA) and eluted  
341 in 30µl elution buffer. Purity and concentration of the gRNA templates were measured with a  
342 spectrophotometer (BioTek Epoch2 microplate reader). gRNA *in vitro* transcription was  
343 performed with the HiScribe™ T7 High Yield RNA Synthesis Kit (NEB), using 500 ng purified  
344 DNA template for 16 h (overnight) at 37°C. RNA samples were treated with TURBODNase  
345 (Ambion, Oberursel, Germany) to remove possible DNA contamination, and purified using the  
346 MEGAclean purification kit (Ambion) [39]. Purified gRNAs were aliquoted and stored at -80°C  
347 until use.

348 The 140 bp single-stranded HDR template 'ssODN\_BFP' (single-stranded  
349 oligodeoxynucleotide\_blue fluorescent protein; P\_1000\_G/BFP\_ssODN\_Glaser) to convert

350 eGFP into BFP was described previously [28] and synthesized by Eurofins Genomics  
351 (EXTREMer oligo, purified salt free, quality control by CGE). It differs from the eGFP sequence  
352 by 3 bases (194C>G, 196T>C, 201C>G), whereby the first change (194C>G; Thr65>Ser65)  
353 causes a reversion of eGFP back to wild-type GFP, the second (196T>C; Tyr66>His66)  
354 converts GFP to BFP. The third SNP (201C>G) is a silent mutation, to further reduce the target  
355 sequence similarity after HDR [28]. The sequence of ssODN\_BFP was verified by sequencing  
356 (Macrogen Europe, Amsterdam), after performing PCR using Platinum Taq polymerase  
357 (Invitrogen), primers P\_1160 (GGCATGGCGGACTTG) and P\_1001  
358 (CCTGAAGTTCATCTGCACCACC) in a Bio-Rad C1000 Touch thermal cycler [95°C, 2 min;  
359 35 cycles of (95°C, 30 s; 50.5°C, 30 s; 72°C, 20 s); 72°C, 2 min]. PCR reaction contained 10  
360 µl 10x Platinum PCR Buffer (-Mg), 1 µl MgSO<sub>4</sub> 50 mM, 1 µl dNTP Mix (2 mM each), 1 µl of  
361 each primer (10 µM), 0.2 µl Platinum Taq polymerase and 440 ng DNA template in a total  
362 volume of 20 µl.

### 363 **Preparation of CRISPR injection mix**

364 Injection mixes for microinjection of embryos contained 360 ng/µl Cas9 protein (1 µg/µl, PNA  
365 Bio, dissolved in its formulation buffer), 200 ng/µl gRNA\_eGFP2 or gRNA\_eGFP2b and 200  
366 ng/µl ssODN\_BFP in a 10 µl volume containing an end-concentration of 300 mM KCl,  
367 according to previous studies [30, 36, 40]. To inhibit NHEJ, 1 mM Scr7 (Xcess biosciences  
368 Inc., catalog number M60082-2) was added to the injection mix. All mixes were freshly  
369 prepared on ice followed by an incubation step for 10 min at 37°C to allow pre-assembly of  
370 gRNA-Cas9 ribonucleoprotein complexes and stored on ice prior to injections.

### 371 **Microinjection of embryos**

372 For microinjection of homozygous *C. capitata* *TREhs43hid<sup>Ala5</sup>\_F1m2* embryos eggs were  
373 collected over a 45-90 min period. Eggs were prepared for injection as previously described  
374 [41] using chemical dechorionization (sodium hypochlorite, 3 min). In brief, embryos were fixed  
375 using double-sided sticky tape onto a microscope slide (Scotch 3M Double Sided Tape 665),  
376 and covered with halocarbon oil 700 (Sigma-Aldrich, Munich, Germany). Injections were  
377 performed using borosilicate needles (GB100F-10 with filaments; Science Products, Hofheim,  
378 Germany), drawn out on a Sutter P-2000 laser-based micropipette puller. The injection station  
379 consisted of a manual micromanipulator (MN-151, Narishige), an Eppendorf femtoJet 4i  
380 microinjector, and an Olympus SZX2-TTR microscope (SDF PLAPO 1xPF objective). The  
381 microscope slide with the injected embryos was placed in a Petri dish containing moist tissue  
382 paper in an oxygen chamber (max. 2 psi) and stored at 25°C, 60% RH for 72 hr to allow larval  
383 hatching. Hatched first instar larvae were transferred from the oil to larval food.

### 384 **Crossing and screening**

385 Each G<sub>0</sub> adult survivor was individually crossed to three *EgII* WT males or female virgins. Eggs  
386 were collected 3-4 times, with an interval of 1 to 2 days. Both G<sub>0</sub> and G<sub>1</sub> flies were screened  
387 for eGFP fluorescence phenotype to detect CRISPR mutagenesis events, G<sub>1</sub> flies additionally  
388 were screened for BFP fluorescence.

### 389 **Genomic DNA extraction, PCR and sequencing**

390 Genomic DNA was extracted from single G<sub>1</sub> flies according to standard protocols. The DNA  
391 was used as template to amplify the region surrounding the gRNA target sites. PCR was  
392 performed in a 50 µl reaction volume using DreamTaq polymerase (Life Technologies), the  
393 eGFP-specific primers P\_145 (ACTTAATCGCCTTGACAGCACATCC) and P\_55  
394 (TGTGATCGCGCTTCTCGTT), and 150 to 250 ng template in a Bio-Rad C1000 Touch

395 thermal cycler [95°C, 3 min; 35 cycles of (95°C, 30 s; 58°C, 30 s; 72°C, 1 min); 72°C, 5 min].  
396 Afterwards, the size of the PCR product was verified by running an aliquot of the reaction on  
397 an agarose gel. The remaining PCR product was purified using a PCR purification kit (DNA  
398 Clean & Concentrator™-25; Zymo Research). All PCR products were verified by sequencing  
399 (Macrogen Europe, Amsterdam; with Primer P\_145).

#### 400 **Verification of mutations and off-target assessment**

401 Assessment of potential off-targets effects of gRNA2 and gRNA2b was performed using the  
402 *C. ceratitis* genome annotation Ccap 1.1 (GCF\_000347755.2\_Ccap\_1.1\_genomic.fna.gz)  
403 from NCBI also using Geneious [42]. Verification of CRISPR-induced mutations on  
404 sequencing results was performed using the Software Package Geneious 10.2.2 [43] by  
405 mapping the sequencing results of G<sub>1</sub> individuals to the eGFP reference sequence [31].

#### 406 **Equipment and settings for screening and image acquisition**

407 Screening of transgenic flies was performed using a Leica M165 FC stereo microscope with  
408 the PLAN 0.8x LWD objective and the following epifluorescence filters: GFP-LP (Excitation  
409 425/60 nm barrier 480 LP nm), YFP (excitation 510/20 nm; barrier 560/40 nm) or ET DAPI BP  
410 (excitation 395/25 nm; barrier 460/50 nm). For bright field and fluorescent image acquisition  
411 of living flies (anesthetized with CO<sub>2</sub> and placed on a 4°C cooler) was carried out using a fully  
412 automated Leica M205FC stereo microscope with a PLANAPO 1.0x objective and a 1x Leica  
413 DFC7000 T camera using Leica LAS X software. In order to enhance screen and print display  
414 of the pictures the image processing software Adobe Photoshop CS5.1 was used to apply  
415 moderate changes to image brightness and contrast. Changes were applied equally across  
416 the entire image and throughout all images.

417

418

419

420

421

422 **Availability of data and material**

423 All data generated or analyzed are included in this article.

424 **Competing interests**

425 The authors declare that they have no competing interests.

426 **Funding**

427 This work was supported by the LOEWE Center for Insect Biotechnology & Bioresources of  
428 the HMWK (MFS), the Fraunhofer Attract program of the Fraunhofer Society (MFS), and the  
429 Emmy Noether program of the German Research Foundation SCHE 1833/1-1 (MFS).

430 **Authors' contributions**

431 RA performed research; MFS, RA and IH designed research; RA, MFS and IH analyzed  
432 data; and RA, IH and MFS wrote the paper. MFS and IH were group leaders for the project.  
433 All authors have read and approved the final version of the manuscript.  
434

435 **Acknowledgements**

436 We wish to thank Tanja Rehling, Derya Arslan and Julia Hehner for technical assistance,  
437 and Kate Sutton for proofreading of the manuscript.

## 438 References

- 439 1. Invasive Species Compendium. Wallingford, UK. 2018 [[www.cabi.org/isc](http://www.cabi.org/isc);  
440 <https://www.cabi.org/isc/datasheet/12367>], Accessed on 03.04.2018
- 441 2. Liquido N, Shinoda, LA, Cunningham, RT: Host plants of the Mediterranean fruit fly  
442 (Diptera:Tephritidae): an annotated world list. *Ann Entomol Soc Am* 1991; 77:1-57.
- 443 3. Gasperi G, Bonizzoni M, Gomulski LM, Murelli V, Torti C, Malacrida AR, Guglielmino  
444 CR: Genetic Differentiation, Gene Flow and the Origin of Infestations of the Medfly,  
445 *Ceratitis capitata*. *Genetica* 2002; 116:125-135.
- 446 4. Malacrida AR, Gomulski LM, Bonizzoni M, Bertin S, Gasperi G, Guglielmino CR:  
447 Globalization and fruitfly invasion and expansion: the medfly paradigm. *Genetica*  
448 2007; 131.
- 449 5. Knipling EF: Possibilities of insect control or eradication through the use of sexually  
450 sterile males. *J Econ Entomol* 1955; 48:459-462.
- 451 6. Rendon P, McInnis D, Lance D, Stewart J: Medfly (Diptera: Tephritidae) genetic  
452 sexing: large-scale field comparison of males-only and bisexual sterile fly releases in  
453 Guatemala. *J Econ Entomol* 2004; 97:1547-1553.
- 454 7. Augustinos AA, Targovska A, Cancio-Martinez E, Schorn E, Franz G, Cáceres C,  
455 Zacharopoulou A, Bourtzis K: *Ceratitis capitata* genetic sexing strains: laboratory  
456 evaluation of strains from mass-rearing facilities worldwide. *Entomol Exp Appl* 2017;  
457 164:305-317.
- 458 8. Busch-Petersen E: Temperature sensitive lethal factors and puparial colour sex  
459 separation mechanisms in the Mediterranean fruit fly, *Ceratitis capitata* (Wied).  
460 Vienna: International Atomic Energy Agency (IAEA); 1990.
- 461 9. Rössler Y: The Genetics of the Mediterranean Fruit Fly: a "White Pupae" Mutant. *Ann*  
462 *Entomol Soc Am* 1979; 72:583-585.
- 463 10. Schetelig MF, Targovska A, Meza JS, Bourtzis K, Handler AM: Tetracycline-  
464 suppressible female lethality and sterility in the Mexican fruit fly, *Anastrepha ludens*.  
465 *Insect Mol Biol* 2016; 25:500-508.
- 466 11. Ogaugwu CE, Schetelig MF, Wimmer EA: Transgenic sexing system for *Ceratitis*  
467 *capitata* (Diptera: Tephritidae) based on female-specific embryonic lethality. *Insect*  
468 *Biochem Mol Biol* 2013; 43:1-8.
- 469 12. Concha C, Palavesam A, Guerrero FD, Sagel A, Li F, Osborne JA, Hernandez Y,  
470 Pardo T, Quintero G, Vasquez M, et al: A transgenic male-only strain of the New  
471 World screwworm for an improved control program using the sterile insect technique.  
472 *BMC Biol* 2016; 14:72.
- 473 13. Schetelig MF, Handler AM: A transgenic embryonic sexing system for *Anastrepha*  
474 *suspensa* (Diptera: Tephritidae). *Insect Biochem Mol Biol* 2012; 42.
- 475 14. European Parliament CotEU: Directive 2001/18/EC of the European Parliament and  
476 of the Council of 12 March 2001 on the deliberate release into the environment of  
477 genetically modified organisms and repealing Council Directive 90/220/EEC. *Official*  
478 *Journal of the European Communities* 2001; 44.
- 479 15. Bobek M: Advocate General's Opinion in Case C-528/16. Press Release No 04/18.  
480 <https://curia.europa.eu/jcms/upload/docs/application/pdf/2018-01/cp180004en.pdf>,  
481 2018.
- 482 16. Bose JL: Chemical and UV Mutagenesis. *Methods Mol Biol* 2016; 1373:111-115.
- 483 17. Doudna JA, Charpentier E: Genome editing. The new frontier of genome engineering  
484 with CRISPR-Cas9. *Science* 2014; 346:1258096.
- 485 18. Ran FA, Hsu PD, Wright J, Agarwala V, Scott DA, Zhang F: Genome engineering  
486 using the CRISPR-Cas9 system. *Nat Protoc* 2013; 8:2281-2308.
- 487 19. Zetsche B, Gootenberg JS, Abudayyeh OO, Slaymaker IM, Makarova KS,  
488 Essletzbichler P, Volz SE, Joung J, van der Oost J, Regev A, et al: Cpf1 is a single  
489 RNA-guided endonuclease of a class 2 CRISPR-Cas system. *Cell* 2015; 163:759-  
490 771.

- 491 20. Kim H, Kim J-S: A guide to genome engineering with programmable nucleases. *Nat*  
492 *Rev Genet* 2014; 15:321-334.
- 493 21. Shrivastav M, De Haro LP, Nickoloff JA: Regulation of DNA double-strand break  
494 repair pathway choice. *Cell Res* 2008; 18:134-147.
- 495 22. Maruyama T, Dougan SK, Truttmann M, Bilate AM, Ingram JR, Ploegh HL: Inhibition  
496 of non-homologous end joining increases the efficiency of CRISPR/Cas9-mediated  
497 precise genome editing. *Nat Biotechnol* 2015; 33:538-542.
- 498 23. Hu Z, Shi Z, Guo X, Jiang B, Wang G, Luo D, Chen Y, Zhu YS: Ligase IV inhibitor  
499 SCR7 enhances gene editing directed by CRISPR-Cas9 and ssODN in human  
500 cancer cells. *Cell Biosci* 2018; 8:12.
- 501 24. Lin S, Staahl BT, Alla RK, Doudna JA: Enhanced homology-directed human genome  
502 engineering by controlled timing of CRISPR/Cas9 delivery. *Elife* 2014; 3:e04766.
- 503 25. Gutschner T, Haemmerle M, Genovese G, Draetta GF, Chin L: Post-translational  
504 Regulation of Cas9 during G1 Enhances Homology-Directed Repair. *Cell Rep* 2016;  
505 14:1555-1566.
- 506 26. Kwart D, Paquet D, Teo S, Tessier-Lavigne M: Precise and efficient scarless genome  
507 editing in stem cells using CORRECT. *Nat Protoc* 2017; 12:329-354.
- 508 27. Paquet D, Kwart D, Chen A, Sproul A, Jacob S, Teo S, Olsen KM, Gregg A, Noggle  
509 S, Tessier-Lavigne M: Efficient introduction of specific homozygous and  
510 heterozygous mutations using CRISPR/Cas9. *Nature* 2016; 533:125-129.
- 511 28. Glaser A, McColl B, Vadolas J: GFP to BFP Conversion: A Versatile Assay for the  
512 Quantification of CRISPR/Cas9-mediated Genome Editing. *Mol Ther Nucleic Acids*  
513 2016; 5:e334.
- 514 29. Heim R, Prasher DC, Tsien RY: Wavelength mutations and posttranslational  
515 autoxidation of green fluorescent protein. *Proc Natl Acad Sci USA* 1994; 91:12501-  
516 12504.
- 517 30. Meccariello A, Monti SM, Romanelli A, Colonna R, Primo P, Inghilterra MG, Del  
518 Corsano G, Ramaglia A, Iazzetti G, Chiarore A, et al: Highly efficient DNA-free gene  
519 disruption in the agricultural pest *Ceratitis capitata* by CRISPR-Cas9  
520 ribonucleoprotein complexes. *Sci Rep* 2017; 7:10061.
- 521 31. Schetelig MF, Caceres C, Zacharopoulou A, Franz G, Wimmer EA: Conditional  
522 embryonic lethality to improve the sterile insect technique in *Ceratitis capitata*  
523 (Diptera: Tephritidae). *BMC Biol* 2009; 7:4.
- 524 32. Doench JG, Hartenian E, Graham DB, Tothova Z, Hegde M, Smith I, Sullender M,  
525 Ebert BL, Xavier RJ, Root DE: Rational design of highly active sgRNAs for CRISPR-  
526 Cas9-mediated gene inactivation. *Nat Biotechnol* 2014; 32:1262-1267.
- 527 33. Yang L, Guell M, Byrne S, Yang JL, De Los Angeles A, Mali P, Aach J, Kim-Kiselak  
528 C, Briggs AW, Rios X, et al: Optimization of scarless human stem cell genome  
529 editing. *Nucleic Acids Res* 2013; 41:9049-9061.
- 530 34. Beumer KJ, Trautman JK, Mukherjee K, Carroll D: Donor DNA utilization during gene  
531 targeting with Zinc-Finger nucleases. *Genes|Genomes|Genetics* 2013; 3:657-664.
- 532 35. Beumer KJ, Trautman JK, Bozas A, Liu JL, Rutter J, Gall JG, Carroll D: Efficient  
533 gene targeting in *Drosophila* by direct embryo injection with zinc-finger nucleases.  
534 *Proc Natl Acad Sci USA* 2008; 105:19821-19826.
- 535 36. Burger A, Lindsay H, Felker A, Hess C, Anders C, Chiavacci E, Zaugg J, Weber LM,  
536 Catena R, Jinek M, et al: Maximizing mutagenesis with solubilized CRISPR-Cas9  
537 ribonucleoprotein complexes. *Development* 2016; 143:2025-2037.
- 538 37. Abbott A: European court suggests relaxed gene-editing rules - Judicial opinion says  
539 restrictive regulations may not apply to plants and animals bred using CRISPR  
540 technique. *Nature news*. <https://www.nature.com/articles/d41586-018-01013-5>, 2018,  
541 Accessed on 07.04.2018
- 542 38. Waltz E: Gene-edited CRISPR mushroom escapes US regulation. *Nature* 2016;  
543 532:293.
- 544 39. Kalajdzic P, Schetelig MF: CRISPR/Cas-mediated gene editing using purified protein  
545 in *Drosophila suzukii*. *Entomol Exp Appl* 2017; 164:350-362.

- 546 40. Kistler KE, Vosshall LB, Matthews BJ: Genome Engineering with CRISPR-Cas9 in  
547 the Mosquito *Aedes aegypti*. *Cell Rep* 2015; 11:51-60.
- 548 41. Handler AMJ, Anthony A.: *Insect Transgenesis: Methods and Applications*. 1st  
549 Edition edn. Boca Raton: CRC Press; 2000.
- 550 42. Papanicolaou A, Schetelig MF, Arensburger P, Atkinson PW, Benoit JB, Bourtzis K,  
551 Castañera P, Cavanaugh JP, Chao H, Childers C, et al: The whole genome  
552 sequence of the Mediterranean fruit fly, *Ceratitidis capitata* (Wiedemann), reveals  
553 insights into the biology and adaptive evolution of a highly invasive pest species.  
554 *Genome Biol* 2016; 17:192.
- 555 43. Kearse M, Moir R, Wilson A, Stones-Havas S, Cheung M, Sturrock S, Buxton S,  
556 Cooper A, Markowitz S, Duran C, et al: Geneious Basic: an integrated and  
557 extendable desktop software platform for the organization and analysis of sequence  
558 data. *Bioinformatics* 2012; 28:1647-1649.

559

560

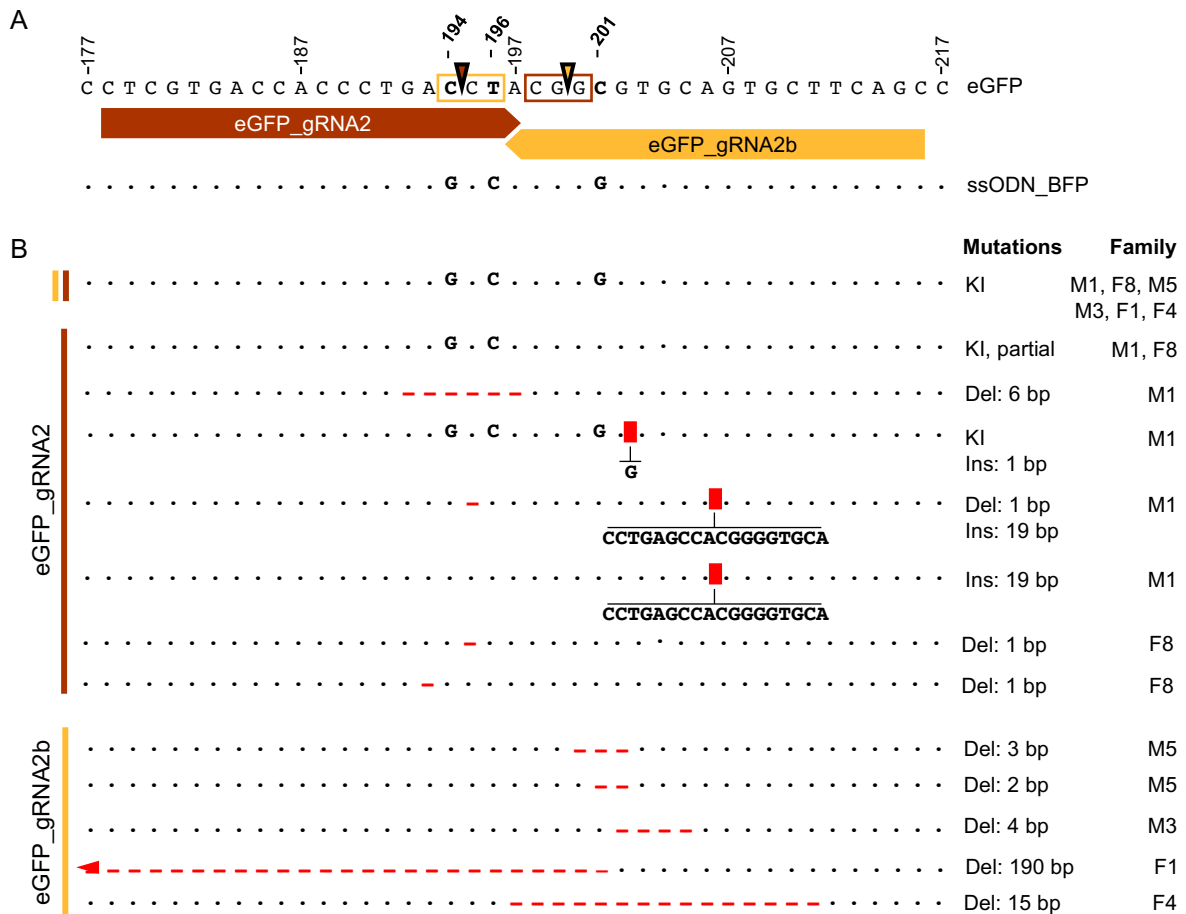

**Fig. 1. Position of gRNAs, protospacer adjacent motifs (PAM), double strand brakes (DSB) and single nucleotide polymorphisms (SNPs) within the eGFP target sequence.** A) Relative to the eGFP sequence the eGFP\_gRNA2 (red) is sense- and the eGFP\_gRNA2b (yellow) is anti-sense-oriented. PAM sequences are highlighted within the eGFP sequence, DSB sites indicated by triangles. Related gRNA, PAM, and DSB site match in color. The ssODN\_BFP sequence differs from the eGFP sequence in three positions, SNPs are (194C>G, 196T>C, 201C>G), and consensus is shown as dots. B) Sequences of mutant eGFP alleles identified in G<sub>1</sub> individuals compared to the eGFP reference sequence. Explanation of indications and abbreviations: consensus is shown as dots, knock-in (KI) mutant sites in uppercase letters, deletions (Del) by red lines, insertion sites (Ins) as red rectangles. Families that were carried the respective mutation(s) are indicated.



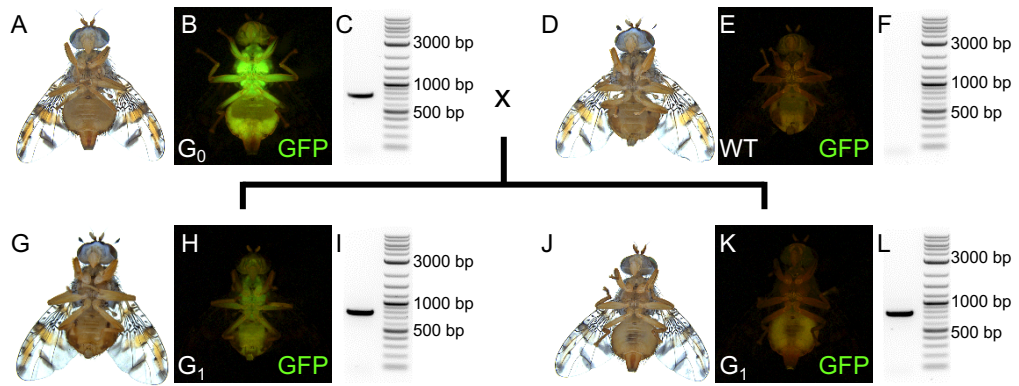

**Fig. 2. Crossing scheme and analysis of G<sub>0</sub> and G<sub>1</sub> individuals.** Shown are fly images in bright field (A, D, G, J) and corresponding eGFP fluorescence (B, E, H, K) as well as the respective PCR validating the presence or absence of the eGFP marker gene (C, F, I, L). The *TREhs43hid<sup>Ala5</sup>\_F1m2* G<sub>0</sub> individual, homozygous for the eGFP marker gene, injected with Cas9 and eGFP \_gRNA2 or -2b, was crossed to WT *EgII* flies. G<sub>1</sub> offspring was either heterozygous for the eGFP marker (H) and positive in eGFP-specific PCR (I), or phenotypically missing the eGFP fluorescence (K), but still carrying the eGFP marker gene (L), which indicates a CRISPR-induced mutagenesis. DNA ladder used for agarose gel is the 2log DNA-ladder (NEB); bp = base pair.

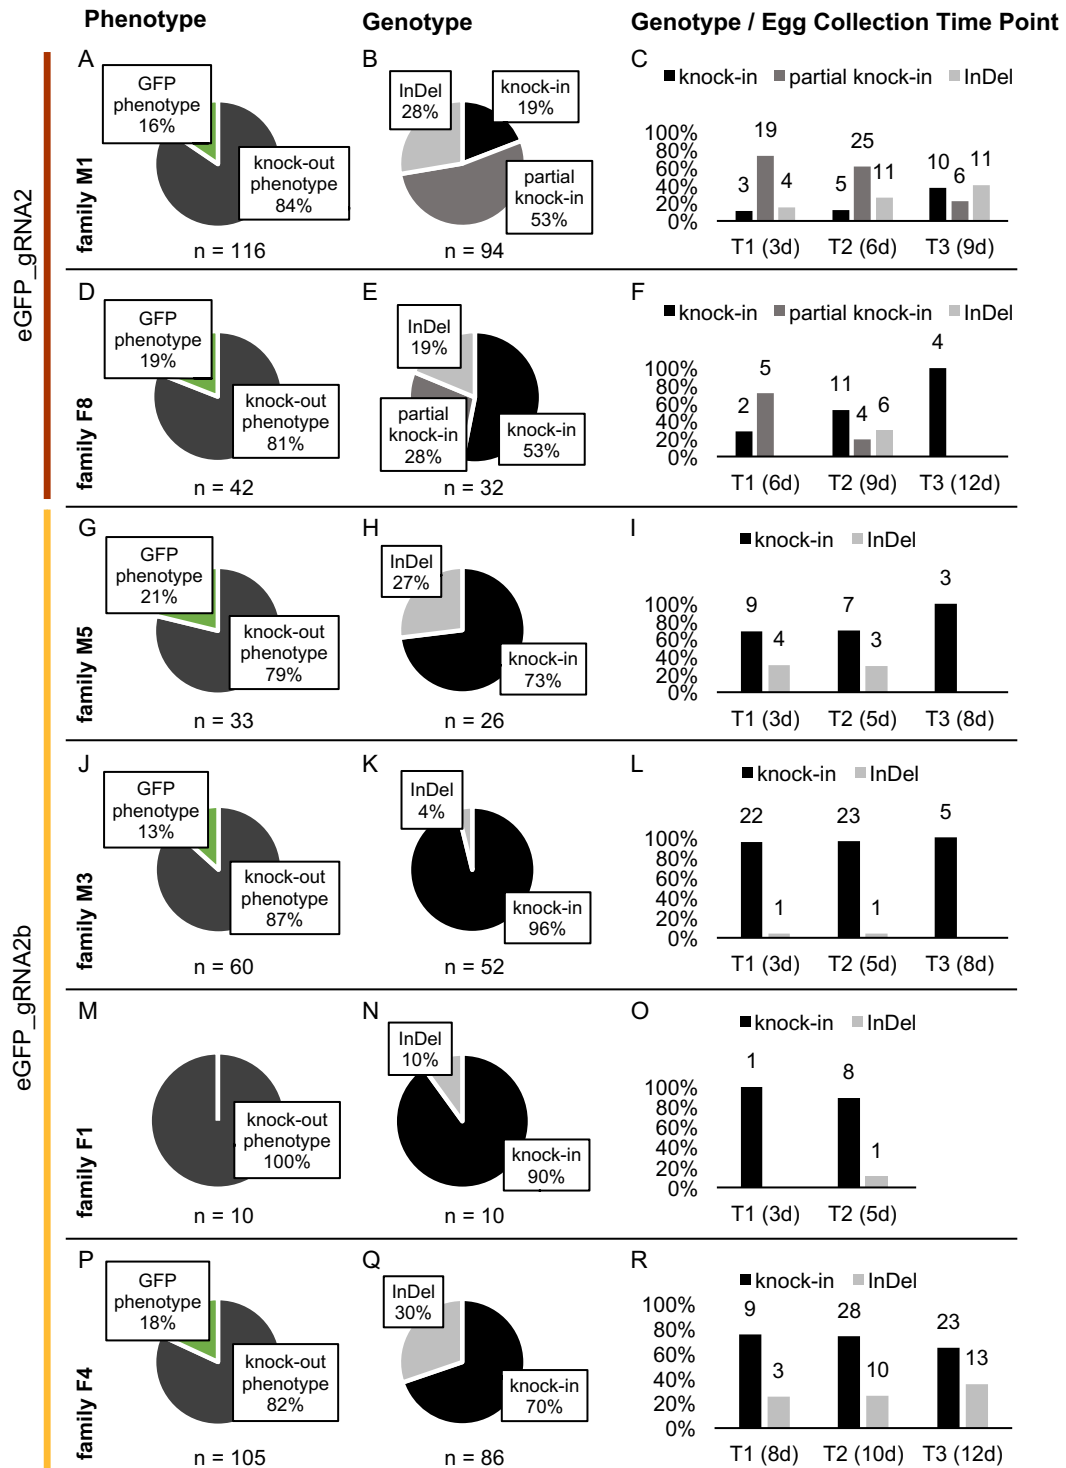

**Fig. 3. Frequency of CRISPR-Cas-induced  $G_1$  phenotypes and genotypes.** Families M1 and F8 were injected with eGFP\_gRNA2 (A-F), families M5, M3, F1 and F4 with eGFP\_gRNA2b (G-R). In the first column, the absolute number of offspring per family and the occurrence of phenotypes “eGFP” (heterozygous) and “knock-out” (eGFP phenotypically missing) are shown (A, D, G, J, M, P). In addition, the second column shows the number of sequenced individuals with the frequency of different mutation types (knock-in, partial knock-in or insertion/deletion (InDel); B, E, H, K, N, Q). The third column shows the mutation types contingent upon egg collection time points (T1, T2, T3, (days after eclosion)) (C, F, I, L, O, R). Numbers above bars indicate absolute number of individuals per mutation per time point.
